# Supplementary material for: New amphiphilic polycarbonates with side functionalized cholesteryl groups as biomesogenic units: synthesis, structure and liquid crystal behavior
Source: Royal Society of Chemistry journal article supplement (doi:10.1039/c7ra00360a), 2017-01-01
Supplement: c7ra00360a1.pdf [file c7ra00360a1.pdf]

## Supporting Information

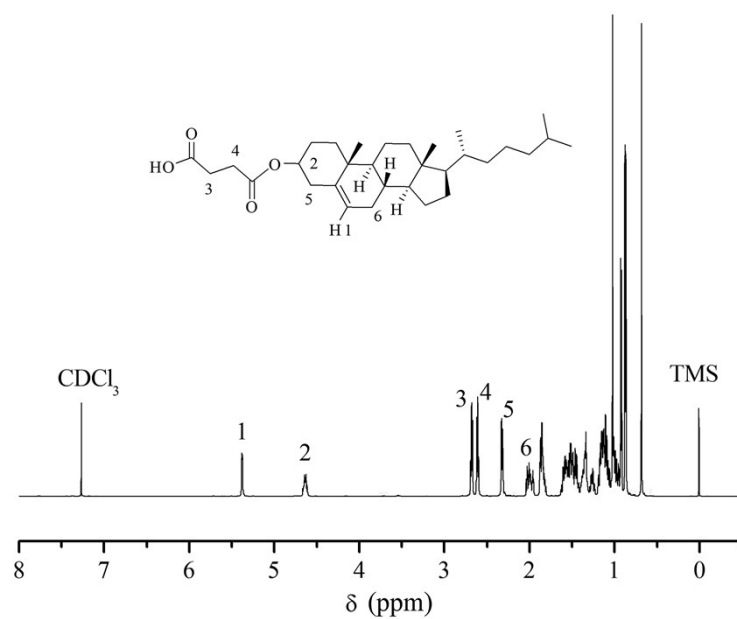

**Figure S1** <sup>1</sup>H NMR spectra of **M<sub>1</sub>**

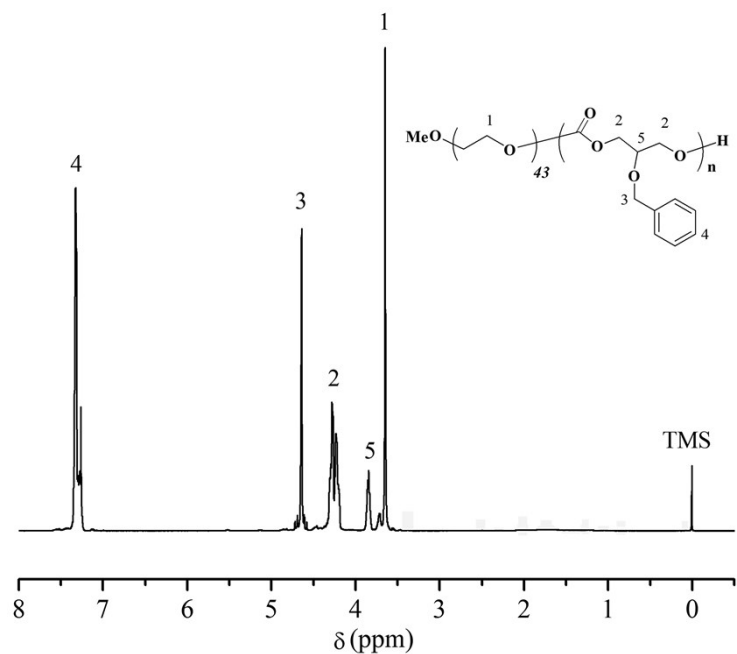

**Figure S2** <sup>1</sup>H NMR spectra of **mPEG<sub>43</sub>-b-PBTMC<sub>50</sub>**

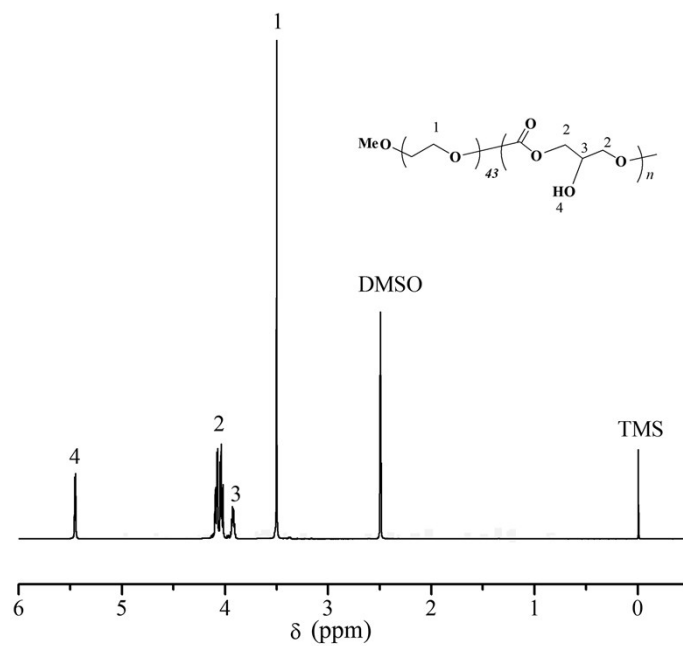

**Figure S3**  $^1\text{H}$  NMR spectra of  $m\text{PEG}_{43}\text{-}b\text{-PHTMC}_{50}$

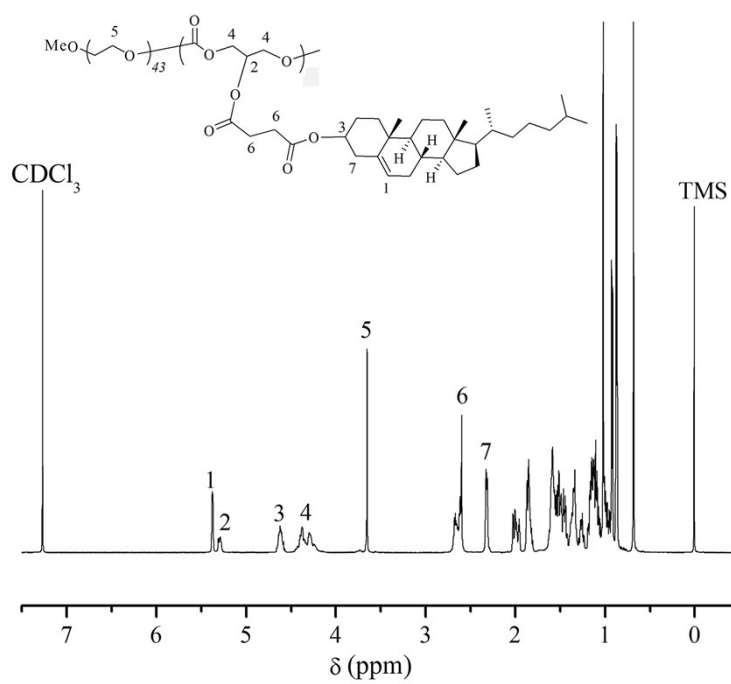

**Figure S4**  $^1\text{H}$  NMR spectra of  $m\text{PEG}_{43}\text{-}b\text{-P(TMC-M}_1\text{)}_{50}$

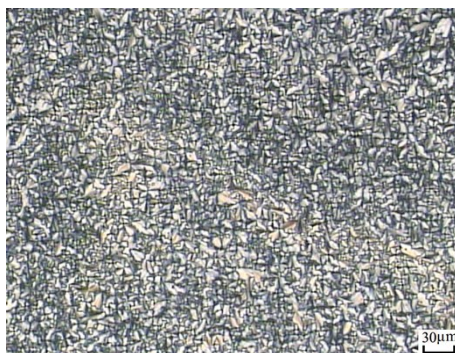

**Figure S5** Optical textures of mPEG<sub>43</sub>-*b*-P(TMC-M<sub>1</sub>)<sub>50</sub>

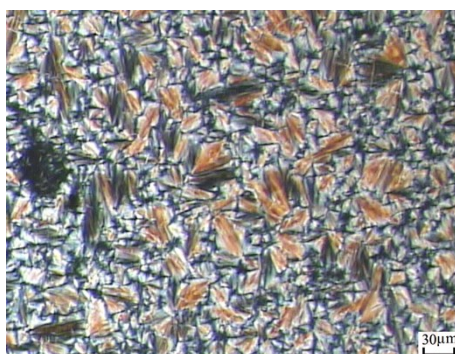

**Figure S6** Optical textures of mPEG<sub>43</sub>-*b*-P(TMC-M<sub>3</sub>)<sub>50</sub>

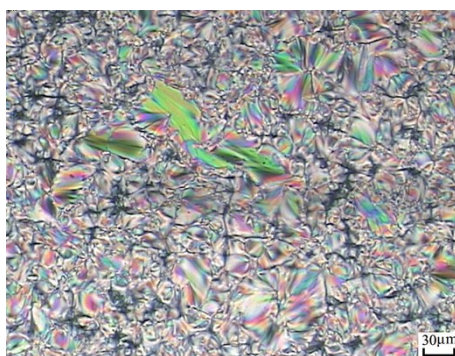

**Figure S7** Optical textures of mPEG<sub>43</sub>-*b*-P(TMC-M<sub>4</sub>)<sub>50</sub>
